# Supplementary material for: Modifier-free gold nanoparticle colorimetric sensing for detecting sulfanilamide in the presence of dopamine
Source: Royal Society of Chemistry journal article supplement (doi:10.1039/d3nj02838k), 2023-01-01
Supplement: d3nj02838k1.pdf [file d3nj02838k1.pdf]

**Supporting Information for**  
**Modifier-free gold nanoparticle colorimetric sensing for detecting**  
**sulfanilamide in the presence of dopamine**

Anh V. T. Le, Thanh-Truc Huynh<sup>b</sup>, Dong-Phuong Truong<sup>a</sup>, Dinh-Trung Nguyen<sup>a</sup>, Van-Phuc  
Dinh<sup>c,\*</sup>, Shu-Hua Cheng<sup>d,\*</sup>

*<sup>a</sup>Center for Analysis and Testing, Dalat University, Lam Dong Province, 670000, Vietnam.*

*<sup>b</sup>Faculty of Chemistry and Environment, Dalat University, Lam Dong Province, 670000, Vietnam.*

*<sup>c</sup>Institute of Applied Technology and Sustainable Development, Nguyen Tat Thanh University, Ho Chi Minh City 700000, Vietnam*

*<sup>d</sup>Department of Applied Chemistry, National Chi Nan University, Puli, Nantou Hsien, 545, Taiwan.*

*\*Corresponding authors: [dvphuc@ntt.edu.vn](mailto:dvphuc@ntt.edu.vn); [shcheng@ncnu.edu.tw](mailto:shcheng@ncnu.edu.tw)*

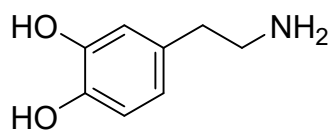

Dopamine (DA)

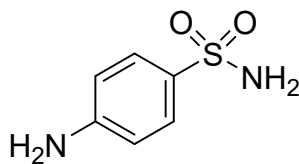

Sulfanilamide (SAA)

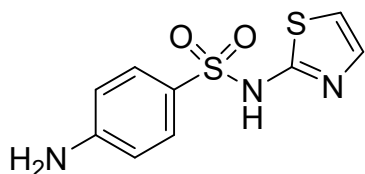

Sulfathiazole (STZ)

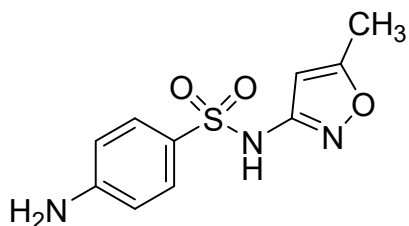

Sulfamethoxazole (SMX)

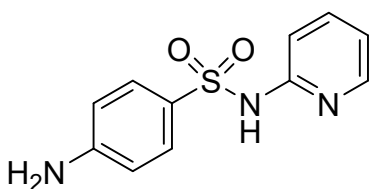

Sulfapyridine (SPD)

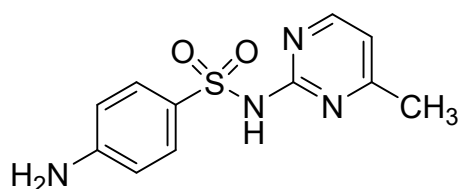

Sulfamerazine (SMR)

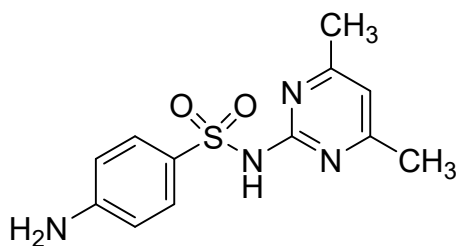

Sulfamethazine (SMZ)

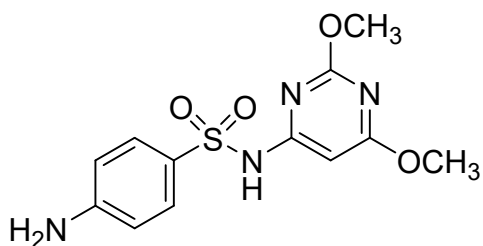

Sulfadimethoxine (SDM)

**Figure 1S. The chemical structure of molecules in this work**

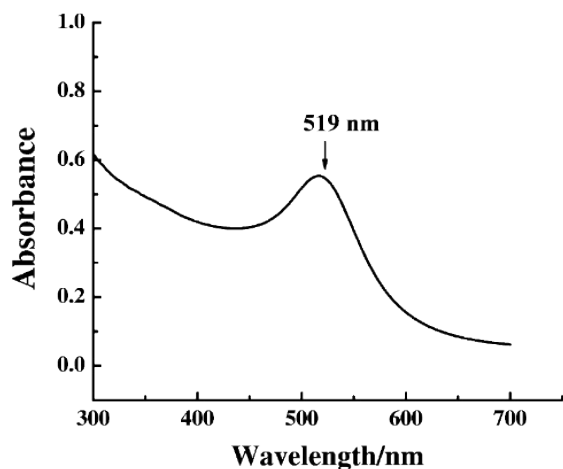

**Figure 2S. UV-Vis spectra of AuNPs**

**Table 1S. Chemicals were used in this work**

| <b>Analyte</b>                                                                                  | <b>Molecular weight, g/mol</b> | <b>Supplier</b> |
|-------------------------------------------------------------------------------------------------|--------------------------------|-----------------|
| Sulfanilamide (SAA), C <sub>6</sub> H <sub>8</sub> N <sub>2</sub> O <sub>2</sub> S              | 172.20                         | J.T BAKER       |
| Dopamine (DA), C <sub>8</sub> H <sub>11</sub> NO <sub>2</sub>                                   | 153.18                         | ACROS           |
| Sodium tetrachloroaurate (III), 99.99%<br>AuCl <sub>4</sub> Na <sub>2</sub> H <sub>2</sub> O    | 397.80                         | SIGMA-ALDRICH   |
| Trisodium citrate, C <sub>6</sub> H <sub>9</sub> Na <sub>3</sub> O <sub>9</sub>                 | 294.10                         | ACROS           |
| Sulfathiazole (STZ), C <sub>9</sub> H <sub>9</sub> N <sub>3</sub> O <sub>2</sub> S <sub>2</sub> | 255.31                         | SIGMA-ALDRICH   |
| Sulfamerazine (SMR), C <sub>11</sub> H <sub>12</sub> N <sub>4</sub> O <sub>2</sub> S            | 264.30                         | SIGMA-ALDRICH   |
| Sulfapyridine (SPD), C <sub>11</sub> H <sub>11</sub> N <sub>3</sub> O <sub>2</sub> S            | 249.28                         | SIGMA-ALDRICH   |
| Sulfamethoxazole (SMX), C <sub>10</sub> H <sub>11</sub> N <sub>3</sub> O <sub>3</sub> S         | 253.27                         | SIGMA-ALDRICH   |
| Sulfamethazine (SMZ), C <sub>12</sub> H <sub>14</sub> N <sub>4</sub> O <sub>2</sub> S           | 278.33                         | SIGMA-ALDRICH   |
| Sulfadimethoxine (SDM), C <sub>12</sub> H <sub>14</sub> N <sub>4</sub> O <sub>4</sub> S         | 310.32                         | SIGMA-ALDRICH   |
